# Supplementary material
Source: publisher figshare collection journal article supplement (https://geolsoc.figshare.com/ndownloader/files/5422367)
Supplement: Supplementary file 1 [file 5422367]

Electron microprobe data, rutile analyses.
Sample	Well	Depth (m)	Grain#	Zr (weight%)	Cr (weight%)	Nb (weight%)	Si (weight%)	Ti (weight%)*	O (weight%)*	Total	Temp1 (�C)	Protolith2
M09-02	2/7-26S	15461	1 / 1 .	0.0063	0.0281	0.4699	0.001	59.9	40	100.41	531	metapelitic
M09-02	2/7-26S	15461	2 / 1 .	0.0121	0.0448	0.1501	0.0014	59.9	40	100.11	574	metapelitic
M09-02	2/7-26S	15461	3 / 1 .	-0.0028	0.0289	1.2759	0.0017	59.9	40	101.20		metapelitic
M09-02	2/7-26S	15461	4 / 1 .	0.0296	0.0525	0.4396	0.0024	59.9	40	100.42	641	metapelitic
M09-02	2/7-26S	15461	5 / 1 .	0.0258	0.0478	0.7298	0.0021	59.9	40		630	metapelitic
M09-02	2/7-26S	15461	6 / 1 .	0.1103	0.0418	0.4183	-0.0003	59.9	40	100.47	762	metapelitic
M09-02	2/7-26S	15461	7 / 1 .	0.0275	0.0623	0.5082	0.0017	59.9	40	100.50	635	metapelitic
M09-02	2/7-26S	15461	8 / 1 .	0.0036	0.0874	0.2127	0.0002	59.9	40	100.20	497	metapelitic
M09-02	2/7-26S	15461	9 / 1 .	0.0161	0.0269	0.2262	0.0012	59.9	40	100.17	594	metapelitic
M09-02	2/7-26S	15461	10 / 1 .	0.0086	0.0271	0.0898	0.0019	59.9	40	100.03	551	metapelitic
M09-02	2/7-26S	15461	11 / 1 .	0.0081	0.0896	0.1482	0.0021	59.9	40	100.15	547	metapelitic
M09-02	2/7-26S	15461	12 / 1 .	0.0136	0.0589	0.2867	0.0008	59.9	40	100.26	582	metapelitic
M09-02	2/7-26S	15461	13 / 1 .	-0.0007	0.1385	0.6633	0.0011	59.9	40	100.70		metapelitic
M09-02	2/7-26S	15461	14 / 1 .	0.0029	0.023	0.0867	0.0039	59.9	40	100.02	485	metapelitic
M09-02	2/7-26S	15461	15 / 1 .	0.0065	0.0093	0.1271	0.0016	59.9	40	100.04	533	metapelitic
M09-02	2/7-26S	15461	16 / 1 .	0.0272	0.0691	0.0698	0.0012	59.9	40	100.07	635	metamafic
M09-02	2/7-26S	15461	17 / 1 .	0.0938	0.5759	0.053	-0.0004	59.9	40	100.62	746	metamafic
M09-02	2/7-26S	15461	18 / 1 .	0.0291	0.3766	0.0068	0.0014	59.9	40	100.31	640	metamafic
M09-02	2/7-26S	15461	19 / 1 .	0.0058	0.017	0.3212	0.0005	59.9	40	100.24	526	metapelitic
M09-02	2/7-26S	15461	20 / 1 .	0.0064	0.1768	0.0945	0.0001	59.9	40	100.18	532	metamafic
M09-02	2/7-26S	15461	21 / 1 .	0.0208	0.0417	0.4706	0.001	59.9	40	100.43	614	metapelitic
M09-02	2/7-26S	15461	22 / 1 .	0.0094	0.1378	0.1069	0.001	59.9	40	100.16	557	metamafic
M09-02	2/7-26S	15461	23 / 1 .	0.0018	0.0378	0.0413	0.0035	59.9	40	99.98	459	metamafic
M09-02	2/7-26S	15461	24 / 1 .	0.0289	0.0528	0.5627	0.0006	59.9	40	100.55	639	metapelitic
M09-02	2/7-26S	15461	25 / 1 .	0.0342	0.0006	0.2771	0.1312	59.9	40	100.34	653	metapelitic
M09-02	2/7-26S	15461	26 / 1 .	0.0644	0.1064	0.0044	0.0032	59.9	40	100.08	709	metamafic
M09-02	2/7-26S	15461	27 / 1 .	0.0176	0.0921	0.2526	0.0015	59.9	40	100.26	601	metapelitic
M09-02	2/7-26S	15461	28 / 1 .	0.0035	0.0635	0.0852	0.0007	59.9	40	100.05	496	metapelitic
M09-02	2/7-26S	15461	29 / 1 .	0.0029	0.0584	0.1901	0.0015	59.9	40	100.15	485	metapelitic
M09-02	2/7-26S	15461	30 / 1 .	0.0047	0.0711	0.0489	0.0007	59.9	40	100.03	513	metamafic
M09-02	2/7-26S	15461	31 / 1 .	0.0357	0.0404	0.3302	0.0005	59.9	40	100.31	657	metapelitic
M09-02	2/7-26S	15461	32 / 1 .	0.0043	0.0205	0.2419	0.0012	59.9	40	100.17	508	metapelitic
M09-02	2/7-26S	15461	33 / 1 .	0.0113	0.0436	0.4522	-0.0009	59.9	40	100.41	569	metapelitic
M09-02	2/7-26S	15461	34 / 1 .	0.0156	0.0126	0.0105	0.0001	59.9	40	99.94	592	metamafic
M09-02	2/7-26S	15461	35 / 1 .	0.0129	0.0283	0.0009	0.0003	59.9	40	99.94	579	metamafic
M09-02	2/7-26S	15461	36 / 1 .	0.0039	0.0311	0.154	0.0052	59.9	40	100.09	502	metapelitic
M09-02	2/7-26S	15461	37 / 1 .	0.063	0.0132	0.0091	0.002	59.9	40	99.99	707	metamafic
M09-02	2/7-26S	15461	38 / 1 .	0.1914	0.1374	0.2228	0.0004	59.9	40	100.45	823	metapelitic
M09-02	2/7-26S	15461	39 / 1 .	0.0244	0.0157	0.004	0.0011	59.9	40	99.95	626	metamafic
M09-02	2/7-26S	15461	40 / 1 .	0.031	0.1767	0.0002	0.0006	59.9	40	100.11	645	metamafic
M09-03	2/7-26S	14423	41 / 1 .	0.0068	0.0365	0.0997	0.0005	59.9	40	100.04	536	metapelitic
M09-03	2/7-26S	14423	42 / 1 .	0.0044	0.0354	0.2305	0.0022	59.9	40	100.17	509	metapelitic
M09-03	2/7-26S	14423	43 / 1 .	0.0151	0.0432	0.1252	0.0008	59.9	40	100.08	590	metapelitic
M09-03	2/7-26S	14423	44 / 1 .	0.015	0.0119	0.3245	0.0021	59.9	40	100.25	589	metapelitic
M09-03	2/7-26S	14423	45 / 1 .	0.0009	0.0387	0.0736	0.0016	59.9	40	100.01	425	metamafic
M09-03	2/7-26S	14423	46 / 1 .	0.0015	0.024	0.4848	0.0016	59.9	40	100.41	450	metapelitic
M09-03	2/7-26S	14423	47 / 1 .	0.007	0.0107	0.107	0.0014	59.9	40	100.03	538	metapelitic
M09-03	2/7-26S	14423	48 / 1 .	0.0013	0.0384	0.2163	0.0032	59.9	40	100.16	443	metapelitic
M09-03	2/7-26S	14423	49 / 1 .	0.0025	0.0597	0.0789	0.0018	59.9	40	100.04	477	metamafic
M09-03	2/7-26S	14423	50 / 1 .	0.0057	0.0084	0.3187	0.0014	59.9	40	100.23	525	metapelitic
M09-03	2/7-26S	14423	51 / 1 .	0.0039	0.0368	0.1292	0.0011	59.9	40	100.07	502	metapelitic
M09-03	2/7-26S	14423	52 / 1 .	0.0012	0.0381	0.1208	0.0031	59.9	40	100.06	439	metapelitic
M09-03	2/7-26S	14423	53 / 1 .	0.003	0.0069	0.0506	0.0018	59.9	40	99.96	487	metamafic
M09-03	2/7-26S	14423	54 / 1 .	0.0056	0.0199	0.265	2.1894	59.9	40	102.38	524	metapelitic
M09-03	2/7-26S	14423	55 / 1 .	0.0178	0.052	0.3105	0.0014	59.9	40	100.28	602	metapelitic
M09-03	2/7-26S	14423	56 / 1 .	0.0038	0.0445	0.134	0.0044	59.9	40	100.09	500	metapelitic
M09-03	2/7-26S	14423	57 / 1 .	0.0005	0.0858	0.0415	0.0059	59.9	40	100.03	398	metamafic
M09-03	2/7-26S	14423	58 / 1 .	0.0108	0.015	0.0919	-0.0011	59.9	40	100.02	566	metamafic
M09-03	2/7-26S	14423	59 / 1 .	0.0093	0.0783	0.0611	0.0023	59.9	40	100.05	556	metamafic
M09-03	2/7-26S	14423	60 / 1 .	0.0051	0.0518	0.3947	0.0046	59.9	40	100.36	518	metapelitic
M09-03	2/7-26S	14423	61 / 1 .	0.0043	0.0131	0.1499	0.002	59.9	40	100.07	508	metapelitic
M09-03	2/7-26S	14423	62 / 1 .	0.0002	0.0244	0.2674	0.0019	59.9	40	100.19	360	metapelitic
M09-03	2/7-26S	14423	63 / 1 .	0.0046	0.0458	0.0358	0	59.9	40	99.99	512	metamafic
M09-03	2/7-26S	14423	64 / 1 .	0.0058	0.0633	0.0174	0.0021	59.9	40	99.99	526	metamafic
M09-03	2/7-26S	14423	65 / 1 .	0.0075	0.0648	0.0574	0.0023	59.9	40	100.03	542	metamafic
M09-03	2/7-26S	14423	66 / 1 .	0.0048	0.0321	0.1922	0.002	59.9	40	100.13	514	metapelitic
M09-03	2/7-26S	14423	67 / 1 .	0.0085	0.0495	0.2897	0.0005	59.9	40	100.25	550	metapelitic
M09-03	2/7-26S	14423	68 / 1 .	0.002	0.2054	0.1397	-0.0006	59.9	40	100.25	465	metamafic
M09-03	2/7-26S	14423	69 / 1 .	0.0039	0.0789	0.2827	0.0007	59.9	40	100.27	502	metapelitic
M09-03	2/7-26S	14423	70 / 1 .	0.0066	0.0303	0.4082	-0.0008	59.9	40	100.34	534	metapelitic
M09-03	2/7-26S	14423	71 / 1 .	0.0061	0.0872	0.2422	0.0031	59.9	40	100.24	529	metapelitic
M09-03	2/7-26S	14423	72 / 1 .	0.0075	0.0282	0.1418	0.0006	59.9	40	100.08	542	metapelitic
M09-03	2/7-26S	14423	73 / 1 .	0.0005	0.0805	0.2429	0.0243	59.9	40	100.25	398	metapelitic
M09-03	2/7-26S	14423	74 / 1 .	0.0051	0.0304	0.5857	0.0009	59.9	40	100.52	518	metapelitic
M09-03	2/7-26S	14423	75 / 1 .	0.0094	0.0027	0.2018	0.0002	59.9	40	100.11	557	metapelitic
M09-03	2/7-26S	14423	76 / 1 .	0.013	0.0556	0.2089	0.0008	59.9	40	100.18	579	metapelitic
M09-03	2/7-26S	14423	77 / 1 .	0.0048	0.0186	0.0522	0.0046	59.9	40	99.98	514	metamafic
M09-03	2/7-26S	14423	78 / 1 .	0.0053	0.0309	0.268	0.0021	59.9	40	100.21	520	metapelitic
M09-03	2/7-26S	14423	79 / 1 .	0.0065	0.0339	0.2939	0.004	59.9	40	100.24	533	metapelitic
M09-03	2/7-26S	14423	80 / 1 .	0.0017	0.5724	0.0616	0.0289	59.9	40	100.56	456	metamafic
M09-04	2/7-23S	14783	81 / 1 .	0.0018	0.021	0.0781	0.0081	59.9	40	100.01	459	metamafic
M09-04	2/7-23S	14783	82 / 1 .	0.008	0.0116	0.1824	0.0029	59.9	40	100.10	546	metapelitic
M09-04	2/7-23S	14783	83 / 1 .	0.0116	0.0096	0.0656	0.0029	59.9	40	99.99	571	metamafic
M09-04	2/7-23S	14783	84 / 1 .	0.0056	0.0925	0.0705	0.0038	59.9	40	100.07	524	metamafic
M09-04	2/7-23S	14783	85 / 1 .	0.0068	0.0664	0.2769	0.0047	59.9	40	100.25	536	metapelitic
M09-04	2/7-23S	14783	86 / 1 .	0.0088	0.096	0.1884	0.0035	59.9	40	100.20	552	metapelitic
M09-04	2/7-23S	14783	87 / 1 .	0.1114	0.0036	0.0281	0.0007	59.9	40	100.04	763	metamafic
M09-04	2/7-23S	14783	88 / 1 .	0.0059	0.0872	0.1397	0.0043	59.9	40	100.14	527	metapelitic
M09-04	2/7-23S	14783	89 / 1 .	0.0782	0.0086	0.0902	0.003	59.9	40	100.08	728	metapelitic
M09-04	2/7-23S	14783	90 / 1 .	0.0045	0.026	0.2334	0.0022	59.9	40	100.17	510	metapelitic
M09-04	2/7-23S	14783	91 / 1 .	0.0159	0.0288	0.9229	0.002	59.9	40	100.87	594	metapelitic
M09-04	2/7-23S	14783	92 / 1 .	0.0153	0.0397	0.5347	0.0018	59.9	40	100.49	591	metapelitic
M09-04	2/7-23S	14783	93 / 1 .	0.0356	0.0315	0.0962	0.0008	59.9	40	100.06	657	metapelitic
M09-04	2/7-23S	14783	94 / 1 .	0.0038	0.0372	0.1078	0.0019	59.9	40	100.05	500	metapelitic
M09-04	2/7-23S	14783	95 / 1 .	0.054	0.0071	0.4053	0.0006	59.9	40	100.37	693	metapelitic
M09-04	2/7-23S	14783	96 / 1 .	0.062	0.1194	0.1923	0.0002	59.9	40	100.27	706	metapelitic
M09-04	2/7-23S	14783	97 / 1 .	0.0062	0.0899	0.1481	0.0033	59.9	40	100.15	530	metapelitic
M09-04	2/7-23S	14783	98 / 1 .	0.0298	0.0359	0.1177	0.0023	59.9	40	100.09	642	metapelitic
M09-04	2/7-23S	14783	99 / 1 .	0.1063	0.0673	0.6112	0.006	59.9	40	100.69	759	metapelitic
M09-04	2/7-23S	14783	100 / 1 .	0.0005	0.0088	0.1468	0.0028	59.9	40	100.06	398	metapelitic
M09-04	2/7-23S	14783	101 / 1 .	0.0376	0.0066	0.0418	0.0029	59.9	40	99.99	661	metamafic
M09-04	2/7-23S	14783	102 / 1 .	0.0182	0.0504	0.0547	0.0015	59.9	40	100.02	603	metamafic
M09-04	2/7-23S	14783	103 / 1 .	0.003	0.0117	0.0328	0.0217	59.9	40	99.97	487	metamafic
M09-04	2/7-23S	14783	104 / 1 .	0.0062	0.1274	0.5742	0.0016	59.9	40	100.61	530	metapelitic
M09-04	2/7-23S	14783	105 / 1 .	0.0046	0.0565	0.2563	0.0016	59.9	40	100.22	512	metapelitic
M09-04	2/7-23S	14783	106 / 1 .	0.0083	0.003	0.0857	0.0028	59.9	40	100.00	549	metapelitic
M09-04	2/7-23S	14783	107 / 1 .	0.0232	0.0647	0.6792	0.0023	59.9	40	100.67	622	metapelitic
M09-04	2/7-23S	14783	108 / 1 .	0.0036	0.0858	0.1866	0.002	59.9	40	100.18	497	metapelitic
M09-04	2/7-23S	14783	109 / 1 .	0.0174	0.0198	0.0857	0.003	59.9	40	100.03	600	metapelitic
M09-04	2/7-23S	14783	110 / 1 .	0.0013	0.0357	0.2802	0.0013	59.9	40	100.22	443	metapelitic
M09-04	2/7-23S	14783	111 / 1 .	0.0028	0.2777	0.1485	0.0017	59.9	40	100.33	483	metamafic
M09-04	2/7-23S	14783	112 / 1 .	0.0203	0.0099	0.0379	0.0075	59.9	40	99.98	612	metamafic
M09-04	2/7-23S	14783	113 / 1 .	0.0012	0.0378	0.2211	0.0017	59.9	40	100.16	439	metapelitic
M09-04	2/7-23S	14783	114 / 1 .	0.0085	0.0279	0.2804	0.0021	59.9	40	100.22	550	metapelitic
M09-04	2/7-23S	14783	115 / 1 .	0.0045	0.0911	0.0513	0.0021	59.9	40	100.05	510	metamafic
M09-04	2/7-23S	14783	116 / 1 .	0.1022	0.1489	0.1362	0.002	59.9	40	100.29	754	metamafic
M09-04	2/7-23S	14783	117 / 1 .	0.0006	0.0107	0.4773	0.0024	59.9	40	100.39	406	metapelitic
M09-04	2/7-23S	14783	118 / 1 .	0.0104	0.0111	0.0682	0.0034	59.9	40	99.99	564	metamafic
M09-04	2/7-23S	14783	119 / 1 .	0.0237	0.0892	0.0126	0.0027	59.9	40	100.03	624	metamafic
M09-04	2/7-23S	14783	120 / 1 .	0.0006	0.0188	0.345	0.002	59.9	40	100.27	406	metapelitic
M09-05	2/7-D07	18428'	1 / 1 .	0.0612	0.0335	0.739	0	59.9	40	100.7338	704	metapelitic
M09-05	2/7-D07	18428'	2 / 1 .	0.0087	0.1781	0.1606	-0.0004	59.9	40	100.247	552	metapelitic
M09-05	2/7-D07	18428'	3 / 1 .	0.012	0.0272	0.3202	0.0016	59.9	40	100.2611	573	metapelitic
M09-05	2/7-D07	18428'	4 / 1 .	0.0068	0.2316	0.0225	0.0008	59.9	40	100.1616	536	metamafic
M09-05	2/7-D07	18428'	5 / 1 .	0.1879	0.0437	0.165	-0.0006	59.9	40	100.2959	821	metapelitic
M09-05	2/7-D07	18428'	6 / 1 .	0.0417	0.047	0.2446	0.0018	59.9	40	100.2351	670	metapelitic
M09-05	2/7-D07	18428'	7 / 1 .	0.0882	0.0448	0.2425	-0.0007	59.9	40	100.2748	740	metapelitic
M09-05	2/7-D07	18428'	8 / 1 .	0.0267	0.0009	0.0625	0.0027	59.9	40	99.9928	633	metamafic
M09-05	2/7-D07	18428'	9 / 1 .	0.0122	0.0314	0.0302	0.0076	59.9	40	99.9814	575	metamafic
M09-05	2/7-D07	18428'	10 / 1 .	0.0119	0.1801	0.411	0.0044	59.9	40	100.5075	573	metapelitic
M09-05	2/7-D07	18428'	11 / 1 .	0.0473	0.0581	0.0362	0.0027	59.9	40	100.0443	681	metamafic
M09-05	2/7-D07	18428'	12 / 1 .	0.005	0.0026	0.008	0.011	59.9	40	99.9265	517	metamafic
M09-05	2/7-D07	18428'	13 / 1 .	0.0038	0.0619	0.3692	0.0022	59.9	40	100.3371	500	metapelitic
M09-05	2/7-D07	18428'	14 / 1 .	0.0116	0.0058	0.4196	0.0052	59.9	40	100.3423	571	metapelitic
M09-05	2/7-D07	18428'	15 / 1 .	0.1836	0.0566	0.4272	0.0022	59.9	40	100.5695	818	metapelitic
M09-05	2/7-D07	18428'	16 / 1 .	0.0089	0.0695	0.2558	0.0014	59.9	40	100.2357	553	metapelitic
M09-05	2/7-D07	18428'	17 / 1 .	0.1447	0.0972	0.3157	0.0001	59.9	40	100.4577	791	metapelitic
M09-05	2/7-D07	18428'	18 / 1 .	0.0142	0.0513	0.2148	0.0015	59.9	40	100.1818	585	metapelitic
M09-05	2/7-D07	18428'	19 / 1 .	0.2294	0.2309	0.1528	-0.0017	59.9	40	100.5115	845	metapelitic
M09-05	2/7-D07	18428'	20 / 1 .	0.0118	0.0753	0.0431	0.0018	59.9	40	100.0321	572	metamafic
M09-05	2/7-D07	18428'	21 / 1 .	0.0247	0.0038	0.0157	0.0026	59.9	40	99.9468	627	metamafic
M09-05	2/7-D07	18428'	22 / 1 .	0.065	0.0831	0.3693	-0.0004	59.9	40	100.4171	710	metapelitic
M09-05	2/7-D07	18428'	23 / 1 .	0.3496	0.0838	0.2067	0.0007	59.9	40	100.5409	898	metapelitic
M09-05	2/7-D07	18428'	24 / 1 .	0.0222	0.0264	0.0598	0.0031	59.9	40	100.0115	619	metamafic
M09-05	2/7-D07	18428'	25 / 1 .	0.0271	0.0263	0.03	0.0004	59.9	40	99.9838	634	metamafic
M09-05	2/7-D07	18428'	26 / 1 .	0.0066	0.1177	0.2294	0.002	59.9	40	100.2557	534	metapelitic
M09-05	2/7-D07	18428'	27 / 1 .	0.0707	0.0397	0.1794	0.0012	59.9	40	100.1911	718	metapelitic
M09-05	2/7-D07	18428'	28 / 1 .	0.0475	0.003	0.0814	0.0021	59.9	40	100.034	681	metapelitic
M09-05	2/7-D07	18428'	29 / 1 .	0.1677	0.0052	0.433	-0.0008	59.9	40	100.5052	808	metapelitic
M09-05	2/7-D07	18428'	30 / 1 .	0.0156	0.0028	0.0374	0.0008	59.9	40	99.9566	592	metamafic
M09-05	2/7-D07	18428'	31 / 1 .	0.0586	0.0772	0.6707	0.0011	59.9	40	100.7076	700	metapelitic
M09-05	2/7-D07	18428'	32 / 1 .	0.1464	0.0512	0.1967	0.0007	59.9	40	100.2949	793	metapelitic
M09-05	2/7-D07	18428'	33 / 1 .	0.0073	0.0441	0.3928	0.0012	59.9	40	100.3454	540	metapelitic
M09-05	2/7-D07	18428'	34 / 1 .	0.0497	0.0072	0.0882	0.0012	59.9	40	100.0463	685	metapelitic
M09-05	2/7-D07	18428'	35 / 1 .	0.0159	0.0154	0.2971	0.0015	59.9	40	100.2298	594	metapelitic
M09-05	2/7-D07	18428'	36 / 1 .	-0.0011	0.0471	0.5708	0.0101	59.9	40	100.5268		metapelitic
M09-05	2/7-D07	18428'	37 / 1 .	0.011	0.0352	0.2706	0.0005	59.9	40	100.2174	567	metapelitic
M09-05	2/7-D07	18428'	38 / 1 .	0.0121	0.2914	0.3194	0.001	59.9	40	100.5239	574	metapelitic
M09-05	2/7-D07	18428'	39 / 1 .	0.0057	0.0437	0.2195	0.0016	59.9	40	100.1706	525	metapelitic
M09-05	2/7-D07	18428'	40 / 1 .	0.0569	0.0437	0.3589	0	59.9	40	100.3595	698	metapelitic
M09-06	2/7-23S	14220'	41 / 1 .	0.0484	0.008	0.1205	-0.0002	59.9	40	100.0767	683	metapelitic
M09-06	2/7-23S	14220'	42 / 1 .	0.0055	0.011	0.121	0.0013	59.9	40	100.0388	522	metapelitic
M09-06	2/7-23S	14220'	43 / 1 .	0.0444	0.0065	0.1011	0.0026	59.9	40	100.0547	676	metapelitic
M09-06	2/7-23S	14220'	44 / 1 .	0.0183	0.0096	0.1268	0.0011	59.9	40	100.0559	604	metapelitic
M09-06	2/7-23S	14220'	45 / 1 .	0.2264	0.1203	0.1467	-0.0012	59.9	40	100.3922	843	metapelitic
M09-06	2/7-23S	14220'	46 / 1 .	0.0221	0.0354	0.3622	0.0013	59.9	40	100.3209	618	metapelitic
M09-06	2/7-23S	14220'	47 / 1 .	0.0251	0.1052	0.1258	0.0009	59.9	40	100.1571	628	metapelitic
M09-06	2/7-23S	14220'	48 / 1 .	0.0091	0.0782	0.3001	0.0014	59.9	40	100.2888	555	metapelitic
M09-06	2/7-23S	14220'	49 / 1 .	0.0084	0.0058	0.0724	-0.0006	59.9	40	99.986	549	metamafic
M09-06	2/7-23S	14220'	50 / 1 .	0.2	0.0923	0.1654	-0.0008	59.9	40	100.357	828	metapelitic
M09-06	2/7-23S	14220'	51 / 1 .	0.0121	0.06	0.3324	0.0024	59.9	40	100.3069	574	metapelitic
M09-06	2/7-23S	14220'	52 / 1 .	0.0732	0.0806	0.2375	0.0019	59.9	40	100.2932	721	metapelitic
M09-06	2/7-23S	14220'	53 / 1 .	0.0375	0.0267	0.0236	0.0019	59.9	40	99.9896	661	metamafic
M09-06	2/7-23S	14220'	54 / 1 .	0.0624	0.0722	0.636	0.0008	59.9	40	100.6714	706	metapelitic
M09-06	2/7-23S	14220'	55 / 1 .	0.0788	0.1112	0.3577	0.0129	59.9	40	100.4606	728	metapelitic
M09-06	2/7-23S	14220'	56 / 1 .	0.0116	0.1033	0.6566	0.0007	59.9	40	100.6722	571	metapelitic
M09-06	2/7-23S	14220'	57 / 1 .	0.0148	0.0047	0.0301	0.0034	59.9	40	99.953	588	metamafic
M09-06	2/7-23S	14220'	58 / 1 .	0.0698	0.057	0.3673	0.0006	59.9	40	100.3947	717	metapelitic
M09-06	2/7-23S	14220'	59 / 1 .	0.0565	0.0064	0.1139	0.0021	59.9	40	100.079	697	metapelitic
M09-06	2/7-23S	14220'	60 / 1 .	0.1529	0.1102	0.2269	0.0008	59.9	40	100.3908	798	metapelitic
M09-06	2/7-23S	14220'	61 / 1 .	0.0224	0.0451	0.1105	0.0031	59.9	40	100.081	619	metapelitic
M09-06	2/7-23S	14220'	62 / 1 .	0.0029	0.0829	0.1552	0.0048	59.9	40	100.1458	485	metapelitic
M09-06	2/7-23S	14220'	63 / 1 .	0.03	0.0019	0.1084	0.0011	59.9	40	100.0414	642	metapelitic
M09-06	2/7-23S	14220'	64 / 1 .	0.0369	0.2865	0.9701	0.0005	59.9	40	101.1941	660	metapelitic
M09-06	2/7-23S	14220'	65 / 1 .	0.1605	0.1881	0.2335	0.0003	59.9	40	100.4824	803	metapelitic
M09-06	2/7-23S	14220'	66 / 1 .	0.0503	0.0226	0.1059	0.0174	59.9	40	100.0963	687	metapelitic
M09-06	2/7-23S	14220'	67 / 1 .	0.0062	0.1766	0.3608	0.0018	59.9	40	100.4453	530	metapelitic
M09-06	2/7-23S	14220'	68 / 1 .	0.0936	0.011	0.0274	0.0009	59.9	40	100.033	746	metamafic
M09-06	2/7-23S	14220'	69 / 1 .	0.1795	0.0672	0.2405	0.0004	59.9	40	100.3876	816	metapelitic
M09-06	2/7-23S	14220'	70 / 1 .	0.2786	0.0719	0.2208	0.001	59.9	40	100.4723	869	metapelitic
M09-06	2/7-23S	14220'	71 / 1 .	0.029	0.0272	0.0543	-0.0018	59.9	40	100.0087	640	metamafic
M09-06	2/7-23S	14220'	72 / 1 .	0.0124	0.2292	0.177	0.0007	59.9	40	100.3193	576	metapelitic
M09-06	2/7-23S	14220'	73 / 1 .	0.0235	0.0566	0.297	0.0014	59.9	40	100.2786	623	metapelitic
M09-06	2/7-23S	14220'	74 / 1 .	0.009	0.2282	0.2115	-0.0008	59.9	40	100.3479	554	metapelitic
M09-06	2/7-23S	14220'	75 / 1 .	0.0143	0.1781	0.2131	0.0001	59.9	40	100.3057	586	metapelitic
M09-06	2/7-23S	14220'	76 / 1 .	0.0101	0.0319	0.0471	0.0017	59.9	40	99.9907	562	metamafic
M09-06	2/7-23S	14220'	77 / 1 .	0.0222	0.0023	0.0297	0.0028	59.9	40	99.9569	619	metamafic
M09-06	2/7-23S	14220'	78 / 1 .	0.0136	0.079	0.1583	0.1544	59.9	40	100.3054	582	metapelitic
M09-06	2/7-23S	14220'	79 / 1 .	0.0062	0.1324	0.0248	0.0024	59.9	40	100.0657	530	metamafic
M09-06	2/7-23S	14220'	80 / 1 .	0.009	0.11	0.1208	0.0033	59.9	40	100.1431	554	metapelitic
M10-09	31/26c-13	8991.3'	81 / 1 .	0.0051	0.0355	0.1863	0.0132	59.9	40	100.1401	518	metapelitic
M10-09	31/26c-13	8991.3'	82 / 1 .	0.1083	0.101	0.1931	0.0005	59.9	40	100.303	760	metapelitic
M10-09	31/26c-13	8991.3'	83 / 1 .	0.0064	0.0261	0.4593	0.0013	59.9	40	100.3931	532	metapelitic
M10-09	31/26c-13	8991.3'	84 / 1 .	0.0148	0.0209	0.3064	-0.0011	59.9	40	100.2411	588	metapelitic
M10-09	31/26c-13	8991.3'	85 / 1 .	0.0039	0.0006	0.02	0.001	59.9	40	99.9255	502	metamafic
M10-09	31/26c-13	8991.3'	86 / 1 .	0.0055	0.0843	0.2934	0.0021	59.9	40	100.2854	522	metapelitic
M10-09	31/26c-13	8991.3'	87 / 1 .	0.0381	0.0702	0.2448	0.0001	59.9	40	100.2532	662	metapelitic
M10-09	31/26c-13	8991.3'	88 / 1 .	0.1219	0.0676	0.3405	-0.0024	59.9	40	100.4276	773	metapelitic
M10-09	31/26c-13	8991.3'	89 / 1 .	0.1251	0.1106	0.2321	-0.0005	59.9	40	100.3674	776	metapelitic
M10-09	31/26c-13	8991.3'	90 / 1 .	0.0261	0.4922	0.097	0.0006	59.9	40	100.516	631	metapelitic
M10-09	31/26c-13	8991.3'	91 / 1 .	0.0143	0.0326	0.0419	0.0009	59.9	40	99.9897	586	metamafic
M10-09	31/26c-13	8991.3'	92 / 1 .	0.0445	0.0482	0.4858	0.0005	59.9	40	100.479	676	metapelitic
M10-09	31/26c-13	8991.3'	93 / 1 .	0.068	0.6055	0.2769	0.0022	59.9	40	100.8525	714	metapelitic
M10-09	31/26c-13	8991.3'	94 / 1 .	0.1151	0.1011	0.1754	0	59.9	40	100.2916	767	metapelitic
M10-09	31/26c-13	8991.3'	95 / 1 .	0.0101	0.0012	0.0232	0.0022	59.9	40	99.9366	562	metamafic
M10-09	31/26c-13	8991.3'	96 / 1 .	0.0035	0.0397	0.0416	0.0031	59.9	40	99.9879	496	metamafic
M10-09	31/26c-13	8991.3'	97 / 1 .	0.0059	0.1097	0.2488	0.0043	59.9	40	100.2686	527	metapelitic
M10-09	31/26c-13	8991.3'	98 / 1 .	0.1248	0.0438	0.2745	-0.0002	59.9	40	100.3429	775	metapelitic
M10-09	31/26c-13	8991.3'	99 / 1 .	0.0083	0.0705	0.092	0.0009	59.9	40	100.0718	549	metapelitic
M10-09	31/26c-13	8991.3'	100 / 1 .	0.1865	0.0842	0.2252	0.0005	59.9	40	100.3964	820	metapelitic
M10-09	31/26c-13	8991.3'	101 / 1 .	0.0561	0.0824	0.5606	0.0002	59.9	40	100.5994	696	metapelitic
M10-09	31/26c-13	8991.3'	102 / 1 .	0.0314	0.1608	0.1619	-0.0003	59.9	40	100.2537	646	metapelitic
M10-09	31/26c-13	8991.3'	103 / 1 .	0.0122	0.1381	0.1875	0.0021	59.9	40	100.2399	575	metapelitic
M10-09	31/26c-13	8991.3'	104 / 1 .	0.0026	0.3335	1.5405	0.0034	59.9	40	101.78	479	metapelitic
M10-09	31/26c-13	8991.3'	105 / 1 .	0.0512	0.4078	0.0573	-0.0007	59.9	40	100.4156	688	metamafic
M10-09	31/26c-13	8991.3'	106 / 1 .	0.0048	0.0886	0.3038	0.0034	59.9	40	100.3005	514	metapelitic
M10-09	31/26c-13	8991.3'	107 / 1 .	0.0249	0.0811	0.6028	0.0006	59.9	40	100.6094	628	metapelitic
M10-09	31/26c-13	8991.3'	108 / 1 .	0.2229	0.0724	0.204	-0.0014	59.9	40	100.398	841	metapelitic
M10-09	31/26c-13	8991.3'	109 / 1 .	0.0502	0.1546	0.3007	0.0005	59.9	40	100.4059	686	metapelitic
M10-09	31/26c-13	8991.3'	110 / 1 .	0.0744	0.0617	0.5549	0.0008	59.9	40	100.5917	723	metapelitic
M10-09	31/26c-13	8991.3'	111 / 1 .	0.0701	0.0311	0.277	0.0006	59.9	40	100.2788	717	metapelitic
M10-09	31/26c-13	8991.3'	112 / 1 .	0.2184	0.1012	0.1921	-0.0007	59.9	40	100.411	839	metapelitic
M10-09	31/26c-13	8991.3'	113 / 1 .	0.0837	0.0652	0.15	0.0002	59.9	40	100.1991	734	metapelitic
M10-09	31/26c-13	8991.3'	114 / 1 .	0.0303	0.0777	0.3146	0.0008	59.9	40	100.3233	643	metapelitic
M10-09	31/26c-13	8991.3'	115 / 1 .	0.0862	0.0449	0.5132	0.0025	59.9	40	100.5468	737	metapelitic
M10-09	31/26c-13	8991.3'	116 / 1 .	0.2166	0.0547	0.2697	-0.0003	59.9	40	100.4408	838	metapelitic
M10-09	31/26c-13	8991.3'	117 / 1 .	0.0079	0.0269	0.0931	0.001	59.9	40	100.0289	545	metapelitic
M10-09	31/26c-13	8991.3'	118 / 1 .	0.008	0.3946	0.0796	0.0005	59.9	40	100.3827	546	metamafic
M10-09	31/26c-13	8991.3'	119 / 1 .	0.0116	0.0041	0.074	0.0127	59.9	40	100.0025	571	metamafic
M10-09	31/26c-13	8991.3'	120 / 1 .	0.0092	0.0573	0.4745	0.0029	59.9	40	100.444	555	metapelitic
* Values given, not analysed
1 Temperature calculated after Watson et al. (2006).
2 Protolith estimated after Meinhold et al. (2008)
